# Supplementary material for: Regenerable chitosan-embedded magnetic iron oxide beads for nitrate removal from industrial wastewater
Source: Royal Society of Chemistry journal article supplement (doi:10.1039/d3va00351e), 2024-01-01
Supplement: d3va00351e1.pdf [file d3va00351e1.pdf]

## Supplementary Information

### Regeneratable chitosan embedded magnetic iron oxide beads for nitrate removal from industrial wastewater

Muntaha Nasir<sup>1</sup>, Farhan Javaid<sup>1</sup>, M Talha Masood<sup>1</sup>, Dr Muhammad Arshad<sup>2</sup>, Muhammad Yasir<sup>3</sup>, Vladimir Sedlarik<sup>3</sup>, Muhammad Abdel Qadir<sup>4</sup>, Hazim M. Qiblawey<sup>5</sup>, Wenjuan Zhang<sup>6</sup>, Kashif Mairaj Deen<sup>7</sup>, Edouard Asselin<sup>7</sup>, Nasir M. Ahmad<sup>1,\*</sup>

<sup>1</sup> Polymer Research Lab, School of Chemical and Materials Engineering (SCME), National University of Sciences and Technology (NUST), H-12, Islamabad, Pakistan

<sup>2</sup> Institute of Environmental Science and Engineering (IESE), National University of Sciences and Technology (NUST), H-12, Islamabad, Pakistan

<sup>3</sup> Centre of Polymer Systems, University Institute, Tomas Bata University in Zlín, Třída Tomáše Bati 5678, 76001 Zlín, Czech Republic

<sup>4</sup> School of Chemistry, The University of the Punjab, Lahore-54590, Pakistan

<sup>5</sup> Department of Chemical Engineering, College of Engineerirng, Qatar University

<sup>6</sup> State Key Laboratory of Advanced Metallurgy, University of Science and Technology Beijing, Beijing 100083, China

<sup>7</sup> Department of Materials Engineering, The University of British Columbia, Vancouver, V6T 1Z4, BC, Canada

**\*Corresponding authors:** Nasir M. Ahmad ([nasir.ahmad@scme.nust.edu.pk](mailto:nasir.ahmad@scme.nust.edu.pk))

### 3.2 EDX elemental analysis

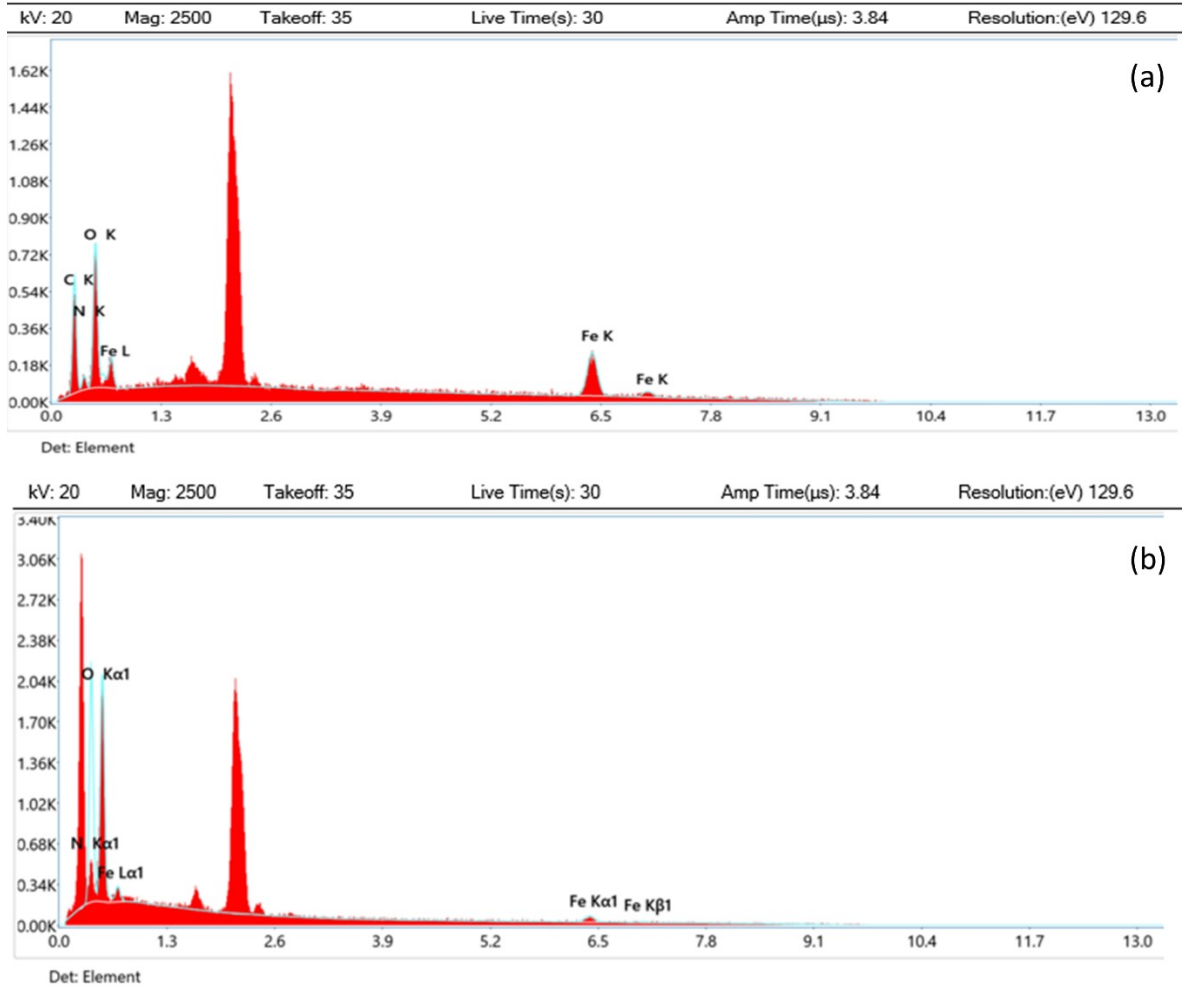

**Figure S1.** EDX analysis of magnetic chitosan bead (IECBs) (a) before adsorption and (b) after adsorption.

**Table S1.** EDX analysis of the IECBs before and after adsorption of nitrates.

| Element | Values before adsorption |      |          |         | Values after adsorption |      |          |         |
|---------|--------------------------|------|----------|---------|-------------------------|------|----------|---------|
|         | Weight %                 | MDL  | Atomic % | Error % | Weight %                | MDL  | Atomic % | Error % |
| C K     | 33.4                     | 1.13 | 44.5     | 12.5    | -                       | -    | -        | -       |
| N K     | 9.1                      | 3.06 | 9.6      | 14.3    | 30.7                    | 0.66 | 34.2     | 10.5    |
| O K     | 41.1                     | 1.39 | 41.1     | 12.3    | 66.7                    | 1.40 | 65.1     | 12.2    |
| Fe K    | 17.0                     | 1.41 | 4.9      | 5.9     | 2.6                     | 0.71 | 0.7      | 30.2    |

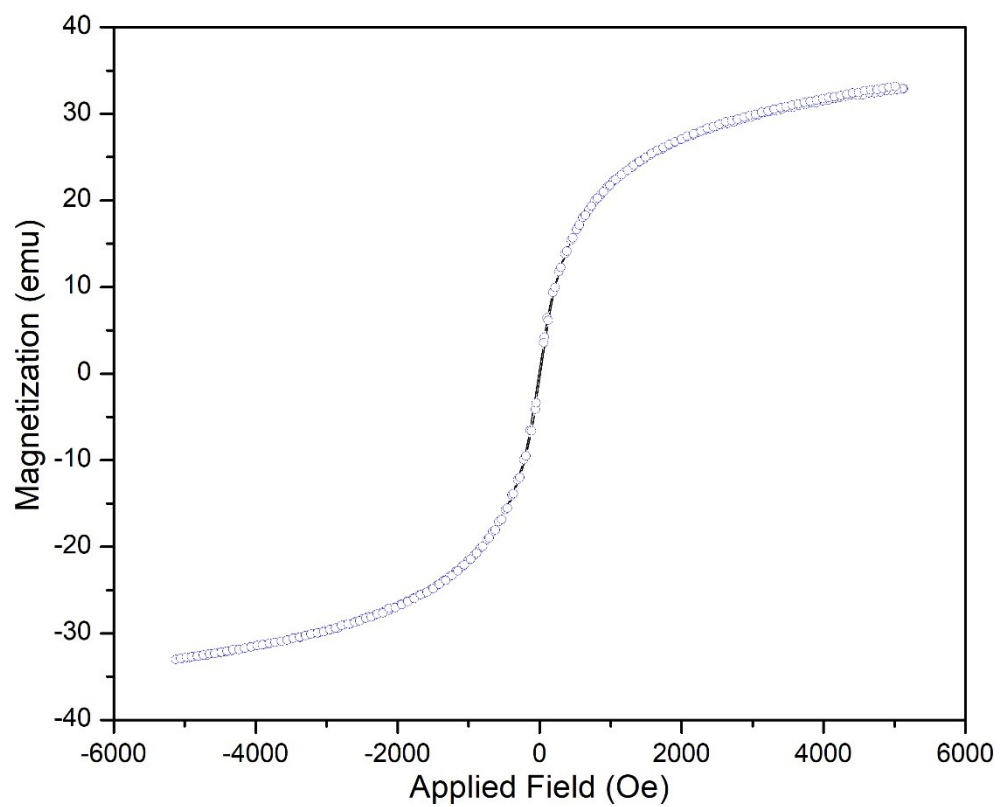

**Figure S2.** Magnetization hysteresis of the developed IECBs.
